# Supplementary material
Source: MDPI journal article supplement (https://www.mdpi.com/2072-4292/14/21/5337)
Supplement: s1 [file s1]

# Supplement of

## A Modified Shape Model incorporating Continuous Accumulated Growing Degree Days for Phenology Detection of Early Rice

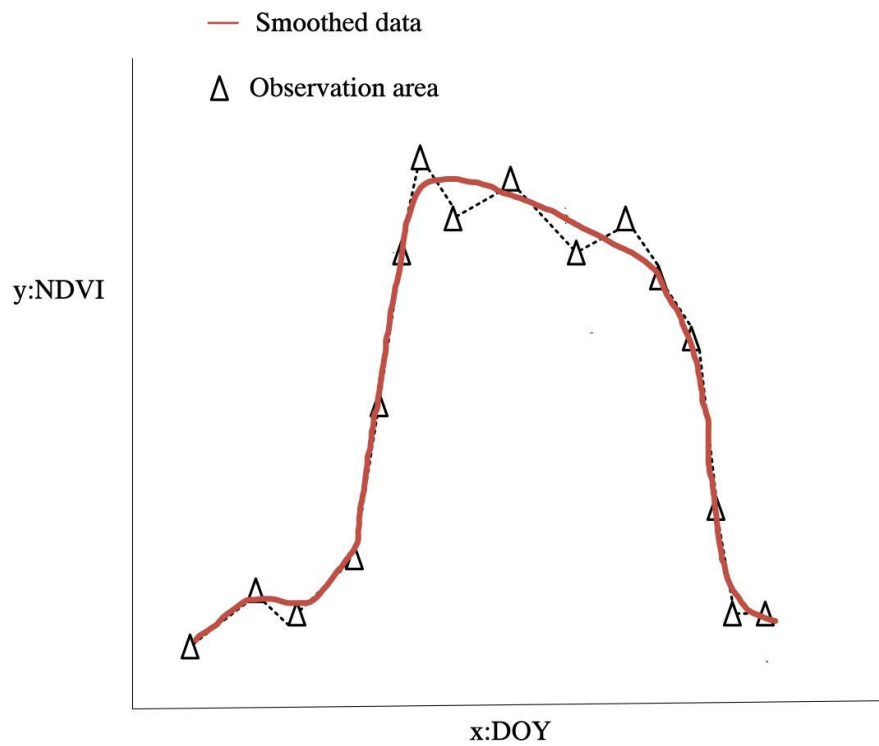

**Figure S1.** The fitted growth curve from MODIS NDVI data for year i.

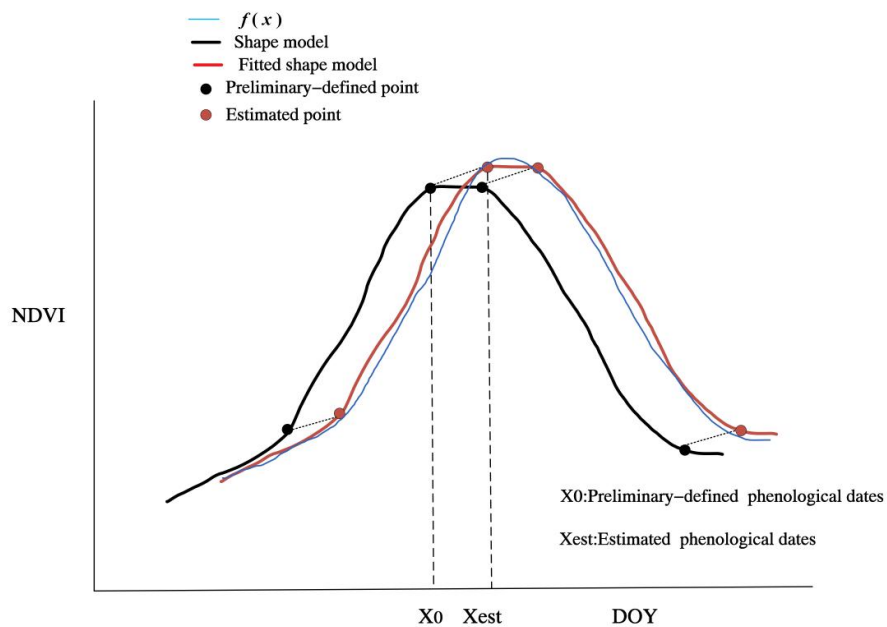

Figure S2. Matching of shape model with growth curve.

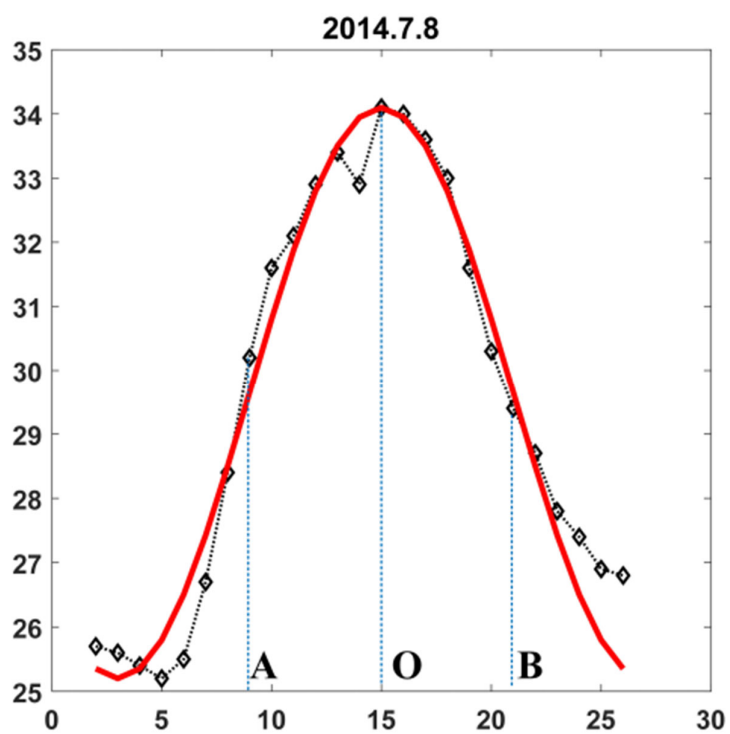

Figure S3. An example of 24-hour temperature fitting.

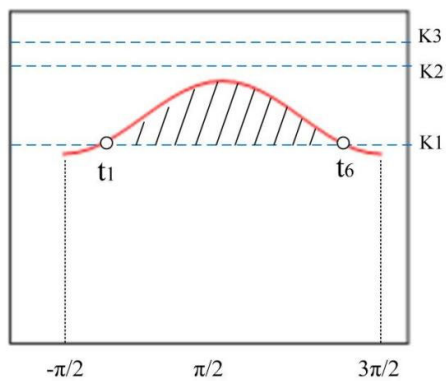

(A)

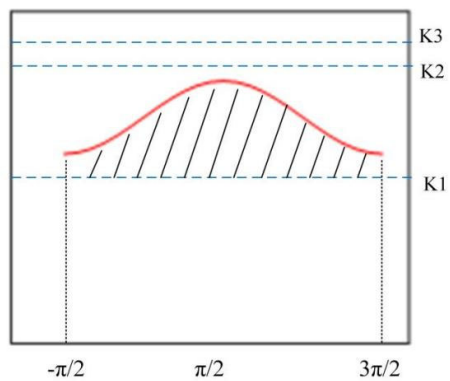

(B)

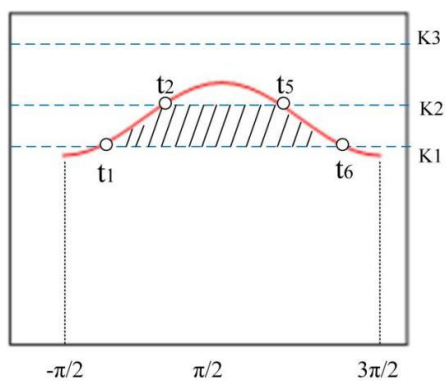

(C)

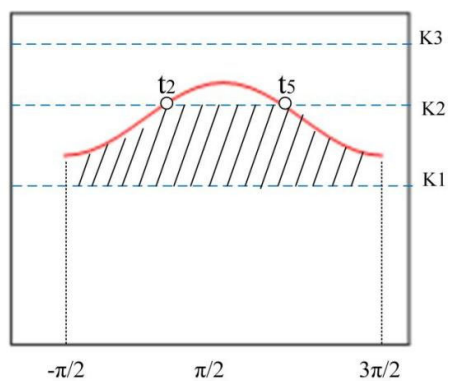

(D)

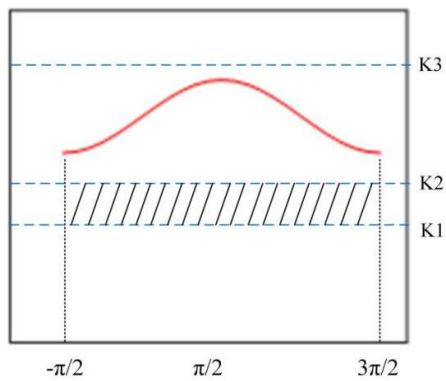

(E)

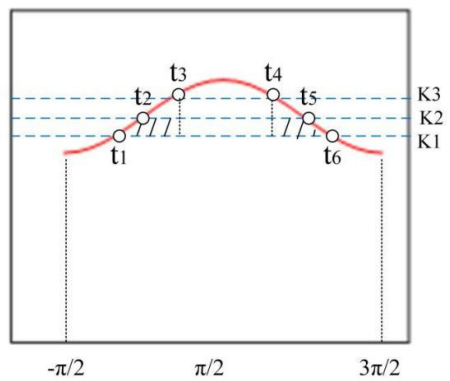

(F)

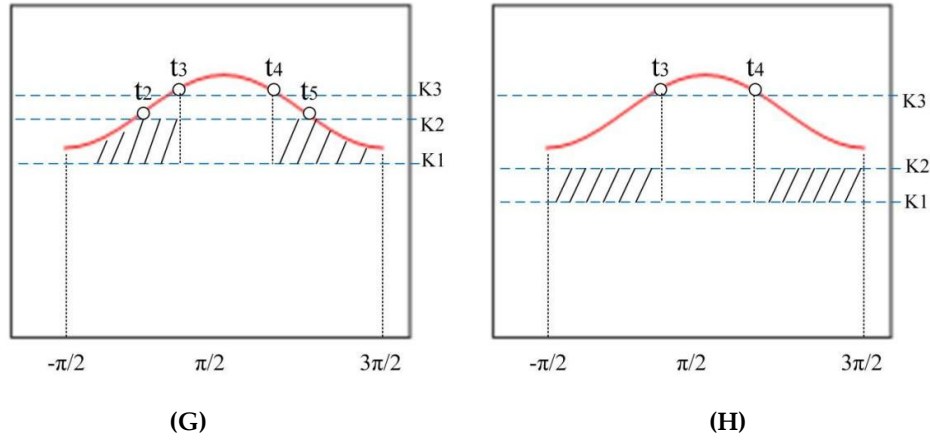

**Figure S4.** Eight cases to calculate the GDD value. (A,B) refer to the case where the daily maximum temperature is greater than K1 and less than K2. (C–E) refer to the case where the daily maximum temperature is greater than K2 and less than K3. (F–H) refer to the case where the daily maximum temperature is greater than K3.

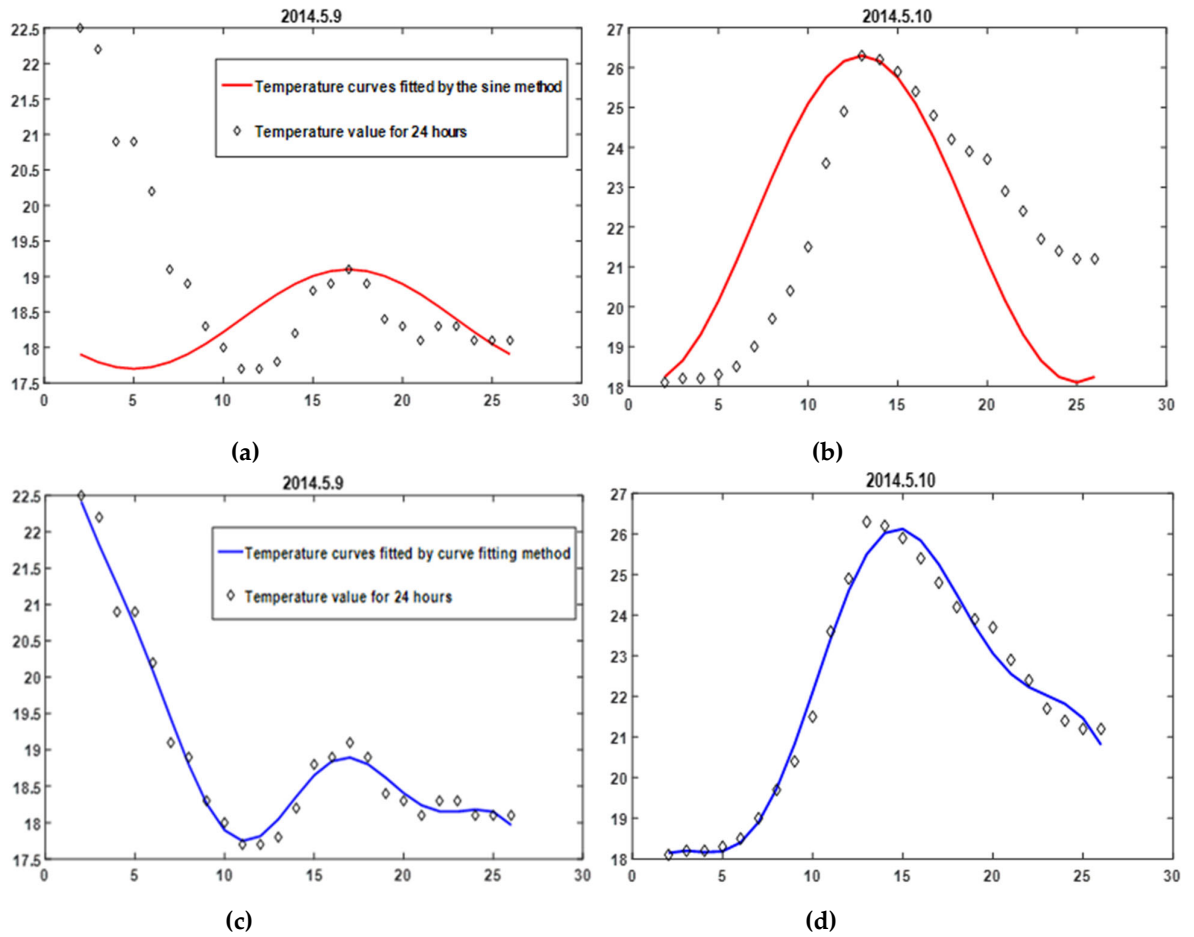

**Figure S5.** The temperature curves fitted by the sine method and the curve fitting method. (a,b) are temperature curves fitted by the sine method; (c,d) are temperature curves fitted by curve fitting method.
